# Supplementary material for: Identifying subgroups within at-risk populations that drive late HIV diagnosis in a Southern U.S. state
Source: PubMed Central journal article supplement — Int J STD AIDS. 2020 Dec 16;32(2):162–9. doi: 10.1177/0956462420947567 (PMC7879228; doi:10.1177/0956462420947567), 2020-12-16

# Supplemental Digital Content 1: Trends in Late HIV Diagnosis in Texas, 1996-2013

Figure 1a: Trends in Presentation with Advanced HIV Disease, by Age Group

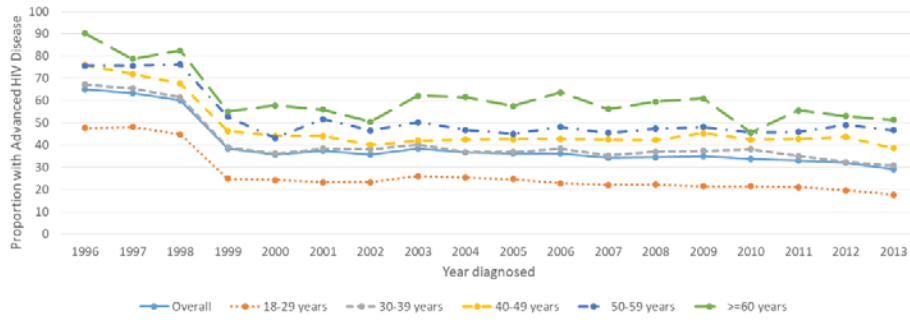

Figure 1b: Trends in Presentation with Advanced HIV Disease, by Race/Ethnicity

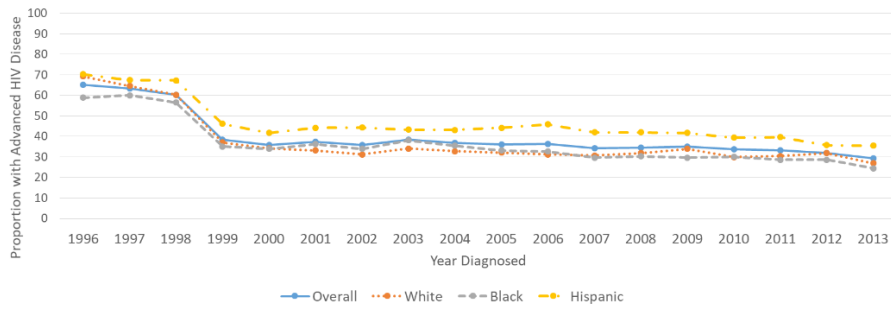

Figure 1c: Trends in Presentation with Advanced HIV Disease, by Risk Group (Males)

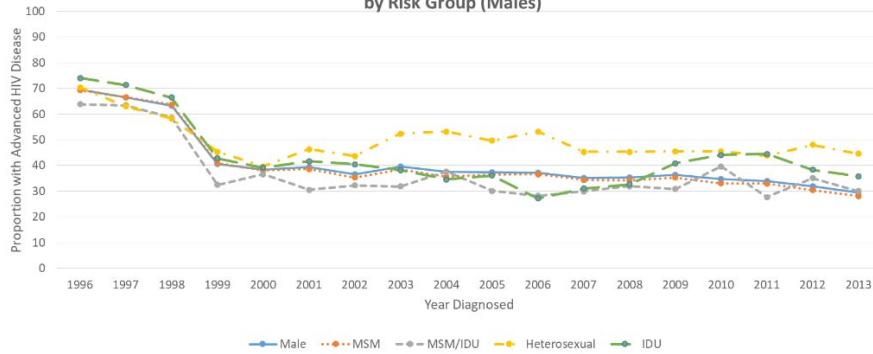

Figure 1d: Trends in Presentation with Advanced HIV Disease, by Risk Group (Females)

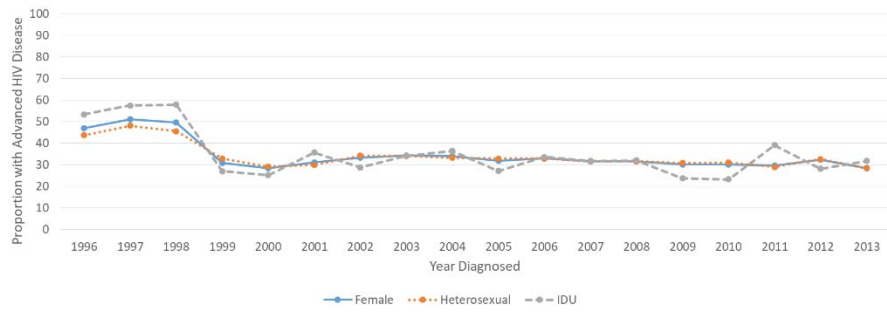

Supplement: sj-pdf-1-std-10.1177_0956462420947567.pdf [file sj-pdf-1-std-10.1177_0956462420947567.pdf]
