# Supplementary material for: Identifying subgroups within at-risk populations that drive late HIV diagnosis in a Southern U.S. state
Source: PubMed Central journal article supplement — Int J STD AIDS. 2020 Dec 16;32(2):162–9. doi: 10.1177/0956462420947567 (PMC7879228; doi:10.1177/0956462420947567), 2020-12-16
Supplement: sj-pdf-2-std-10.1177_0956462420947567.pdf [file sj-pdf-2-std-10.1177_0956462420947567.pdf]

**Supplemental Digital Content 2: Late HIV Diagnosis by Age, Gender, Race/Ethnicity, Risk Group, and Calendar Year (Percentages)**

|      | Age (years) |       |       |       |      | Race/Ethnicity |       |          |       |         | Risk Group (Males) |      |         |        |       | Risk Group (Females) |      |       |
|------|-------------|-------|-------|-------|------|----------------|-------|----------|-------|---------|--------------------|------|---------|--------|-------|----------------------|------|-------|
|      | 18-29       | 30-39 | 40-49 | 50-59 | ≥60  | White          | Black | Hispanic | Other | Unknown | MSM                | IDU  | MSM/IDU | Hetero | Other | Hetero               | IDU  | Other |
| 1996 | 47.7        | 67.1  | 75.9  | 75.6  | 90.0 | 69.2           | 58.8  | 70.2     | 54.2  | 52.5    | 69.3               | 74.0 | 63.8    | 70.4   | 72.7  | 43.8                 | 53.3 | 85.7  |
| 1997 | 48.1        | 65.4  | 71.9  | 75.5  | 78.7 | 64.6           | 60.0  | 67.4     | 52.2  | 55.6    | 66.6               | 71.3 | 63.4    | 63.0   | 100.0 | 48.1                 | 57.6 | 80.0  |
| 1998 | 44.8        | 61.4  | 67.7  | 76.2  | 82.4 | 60.3           | 56.4  | 67.3     | 57.1  | 42.9    | 63.7               | 66.5 | 58.7    | 58.2   | 100.0 | 45.6                 | 57.9 | 100.0 |
| 1999 | 25.0        | 39.1  | 46.4  | 52.7  | 55.0 | 37.0           | 35.2  | 46.2     | 35.7  | 23.9    | 40.9               | 42.7 | 32.4    | 45.3   | 50.0  | 32.9                 | 27.1 | 0.0   |
| 2000 | 24.3        | 36.2  | 44.2  | 43.1  | 57.8 | 34.2           | 33.9  | 41.7     | 30.2  | 26.2    | 38.1               | 39.1 | 36.6    | 40.0   | 75.0  | 29.2                 | 25.3 | 66.7  |
| 2001 | 23.4        | 38.4  | 44.1  | 51.6  | 56.0 | 33.1           | 36.2  | 44.2     | 43.3  | 27.6    | 38.7               | 41.6 | 30.6    | 46.4   | 50.0  | 29.9                 | 35.8 | 66.7  |
| 2002 | 23.4        | 38.2  | 40.1  | 46.6  | 50.5 | 31.2           | 33.9  | 44.3     | 44.7  | 22.5    | 35.3               | 40.5 | 32.3    | 43.7   | 50.0  | 34.3                 | 28.8 | 100.0 |
| 2003 | 26.0        | 40.3  | 42.0  | 50.3  | 62.1 | 34.1           | 38.1  | 43.3     | 42.6  | 29.9    | 38.4               | 38.2 | 31.8    | 52.4   | 66.7  | 34.2                 | 34.3 | 100.0 |
| 2004 | 25.4        | 36.8  | 42.6  | 46.8  | 61.5 | 32.8           | 35.4  | 43.1     | 43.9  | 25.0    | 35.6               | 34.6 | 37.6    | 53.2   | 50.0  | 33.3                 | 36.4 | 100.0 |
| 2005 | 24.7        | 36.9  | 42.6  | 45.1  | 57.5 | 32.1           | 33.2  | 44.2     | 22.2  | 29.7    | 36.4               | 36.1 | 30.1    | 50.0   | 83.3  | 33.0                 | 27.2 | 0.0   |
| 2006 | 22.9        | 38.4  | 42.8  | 48.1  | 63.6 | 31.2           | 32.6  | 45.8     | 31.4  | 29.9    | 36.6               | 27.2 | 28.2    | 53.2   | 66.7  | 32.9                 | 33.6 | 66.7  |
| 2007 | 22.2        | 35.3  | 42.6  | 45.5  | 56.2 | 30.8           | 29.6  | 42.0     | 40.0  | 37.3    | 34.4               | 31.0 | 29.9    | 45.3   | 100.0 | 31.6                 | 31.8 | -     |
| 2008 | 22.3        | 37.0  | 43.3  | 47.5  | 59.5 | 31.9           | 30.4  | 42.0     | 36.2  | 30.1    | 34.3               | 32.6 | 32.0    | 45.3   | 100.0 | 31.7                 | 32.1 | -     |
| 2009 | 21.5        | 37.5  | 45.3  | 48.1  | 60.9 | 33.9           | 29.7  | 41.7     | 47.7  | 33.3    | 35.3               | 40.9 | 30.9    | 45.5   | 0.0   | 30.8                 | 23.8 | -     |
| 2010 | 21.5        | 38.1  | 42.4  | 45.6  | 45.6 | 30.0           | 30.1  | 39.4     | 37.9  | 39.7    | 33.0               | 44.0 | 39.6    | 45.5   | 100.0 | 31.1                 | 23.3 | -     |
| 2011 | 21.2        | 35.1  | 42.7  | 46.0  | 55.6 | 30.4           | 28.6  | 39.6     | 37.5  | 28.0    | 33.0               | 44.4 | 27.7    | 43.8   | -     | 29.0                 | 39.1 | -     |
| 2012 | 19.8        | 32.4  | 43.8  | 49.0  | 53.1 | 31.9           | 28.6  | 35.7     | 31.7  | 29.5    | 30.5               | 38.3 | 35.1    | 48.1   | -     | 32.7                 | 28.2 | -     |
| 2013 | 17.8        | 30.9  | 38.7  | 46.6  | 51.4 | 26.9           | 24.4  | 35.4     | 27.3  | 33.9    | 28.1               | 35.8 | 30.0    | 44.5   | -     | 28.4                 | 31.8 | -     |
